# Supplementary material for: N-Glycoprofiling of SLC35A2-CDG: Patient with a Novel Hemizygous Variant
Source: MDPI journal article supplement (doi:10.3390/biomedicines11020580), 2023-02-16
Supplement: s1 [file s1]

Supplementary material

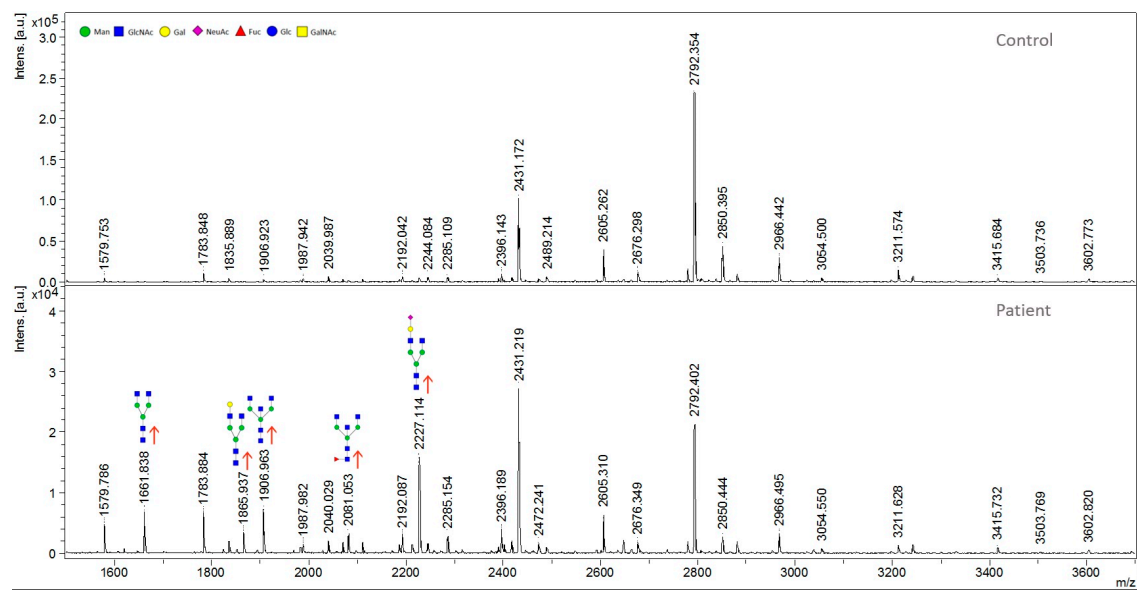

Figure S1. MALDI-TOF/TOF MS of increased hypogalactosylated derivatized N-glycans released from the patient's and control blood serum.

| Organism name                | Uniprot ID |        |   |
|------------------------------|------------|--------|---|
| <i>H. sapiens</i>            | P78381     | KILTTA | F |
| <i>P. abelii</i>             | A0A2J8R8J3 | KILTTA | F |
| <i>C. syrichta</i>           | A0A1U7UF56 | KILTTA | F |
| <i>P. macrocephalus</i>      | A0A2Y9FGB5 | KILTTA | F |
| <i>B. taurus</i>             | Q6YC49     | KILTTA | F |
| <i>E. caballus</i>           | F7C7T4     | KILTTA | F |
| <i>C. lupus familiaris</i>   | O77592     | KILTTA | F |
| <i>V. vulpes</i>             | A0A3Q7SA97 | KILTTA | F |
| <i>P. pardus</i>             | A0A6P4T3G7 | KILTTA | F |
| <i>O. rosmarus divergens</i> | A0A2U3VNZ3 | KILTTA | F |
| <i>P. vampyrus</i>           | A0A6P3RXC5 | KILTTA | F |
| <i>P. discolor</i>           | A0A6J2MGD1 | KILTTA | F |
| <i>M. musculus</i>           | Q9ROM8     | KILTTA | F |
| <i>C. griseus</i>            | Q99PG7     | KILTTA | F |
| <i>M. auratus</i>            | A0A1U8CKB9 | KILTTA | F |
| <i>D. ordii</i>              | A0A1S3GII7 | KILTTA | F |
| <i>H. glaber</i>             | A0A0P6J5Z9 | KILTTA | F |
| <i>E. europaeus</i>          | A0A1S3A515 | KILTTA | F |
| <i>L. striata domestica</i>  | A0A218U883 | KILTTA | F |
| <i>O. spaldingii</i>         | A0A7K8G0Q9 | KILTTA | F |
| <i>B. capensis</i>           | A0A7K9I2Y8 | KILTTA | F |
| <i>X. laevis</i>             | A5PKQ2     | KILTTA | F |
| <i>P. guttatus</i>           | A0A6P9D2P8 | KILTTA | F |
| <i>S. salar</i>              | A0A1S3LGH5 | KILTTA | F |
| <i>C. gobio</i>              | A0A6J2PFP1 | KILTTA | F |
| <i>C. chanos</i>             | A0A6J2W8A0 | KILTTA | F |
| <i>P. ranga</i>              | A0A6P7IV90 | KILTTA | F |
| <i>C. magur</i>              | A0A8J4THQ4 | KILTTA | F |
| <i>I. punctatus</i>          | W5U FK5    | KILTTA | F |
| <i>A. spatula</i>            | A0A8J7P5A1 | KILTTA | F |

Figure S2. Multiple sequence alignment (MSA) results - aligned human protein (P78381) with orthologues. Residues highlighted (Leucine with green, Valine with magenta) at position 154 in the human protein P78381.

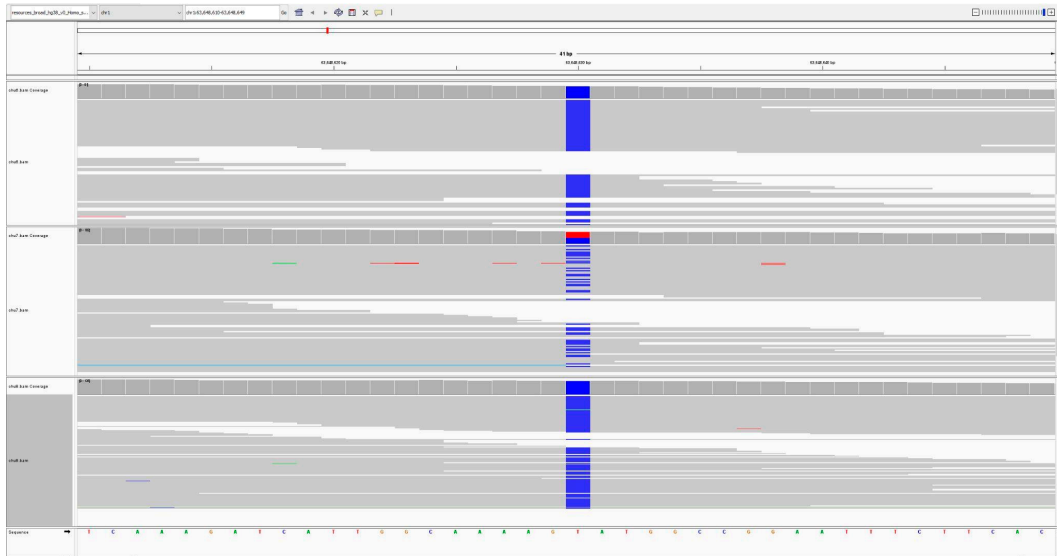

**Figure S3. Screenshot from Integrative genomics viewer [37] of the mutation at position chr1: 63648630 in gene *PGM1*. The patient is labeled as chu6, parents are samples chu7 and chu8.**

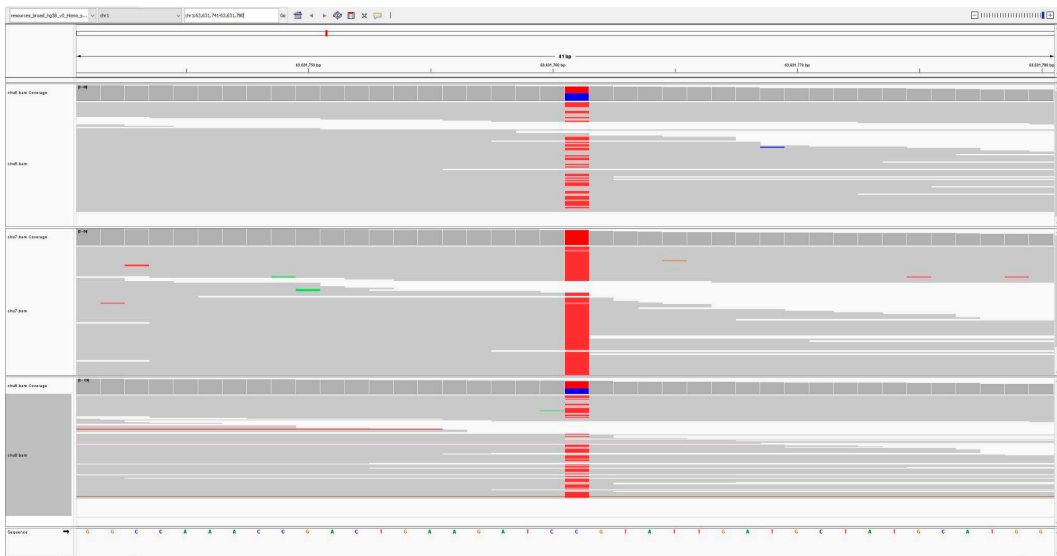

**Figure S4. Screenshot from Integrative genomics viewer [37] of the mutation at position chr1: 63631761 in gene *PGM1*. The patient is labeled as chu6, parents are samples chu7 and chu8.**

| Subtype                                        | SLC35A2-CDG<br>presented patient | Galactosemia [32]                                                                                  | B4GALT1-CDG [33]                     | TMEM165-CDG [35,<br>36]      | PGM1-CDG [36]        | COGs-CDG [33, 36]                     |
|------------------------------------------------|----------------------------------|----------------------------------------------------------------------------------------------------|--------------------------------------|------------------------------|----------------------|---------------------------------------|
| Deficient enzyme                               | UDP-galactose<br>transporter     | galactose-1-phosphate<br>uridylyltransferase,<br>galactokinase 1,<br>UDP-galactose-4-<br>epimerase | beta-1,4-<br>galactosyltransferase 1 | transmembrane protein<br>165 | phosphoglucomutase 1 | conserved oligomeric<br>Golgi complex |
| Increased serum N-glycan biomarker             |                                  |                                                                                                    |                                      |                              |                      |                                       |
| Hex3HexNAc4<br><i>m/z</i> 1661.9               | +                                | +/-                                                                                                | +                                    | +                            | +                    | -                                     |
| Hex3HexNAc4Fuc1<br><i>m/z</i> 1835.9           | -                                | +/-                                                                                                | +                                    | +                            | -                    | +                                     |
| Hex3HexNAc5<br><i>m/z</i> 1906.9               | +                                | -                                                                                                  | +                                    | -                            | -                    | -                                     |
| Hex3HexNAc5Fuc1<br><i>m/z</i> 2081.1           | +                                | -                                                                                                  | +                                    | -                            | -                    | -                                     |
| Hex4HexNAc4<br><i>m/z</i> 1865.1               | +                                | +/-                                                                                                | -                                    | +/-                          | -                    | +/-                                   |
| Hex4HexNAc4NeuAc1<br><i>m/z</i> 2227.2         | +                                | -                                                                                                  | +                                    | +                            | +                    | +                                     |
| Hex5HexNAc4NeuAc1<br><i>m/z</i> 2431.2         | -                                | -                                                                                                  | -                                    | +/-                          | +/-                  | +                                     |
| Hex5HexNAc4NeuAc1<br>Fuc1<br><i>m/z</i> 2605.3 | -                                | -                                                                                                  | -                                    | +                            | -                    | +                                     |

**Table S1. List of other diseases that could affect galactose metabolism and lead to similar serum glycoprofile as in SLC35A2-CDG, with respective increased levels (+) or normal levels (-) of N-glycan biomarkers. Fuc - fucose, Hex- hexose, HexNAc - N-acetylhexosamine, NeuAc - sialic acid.**

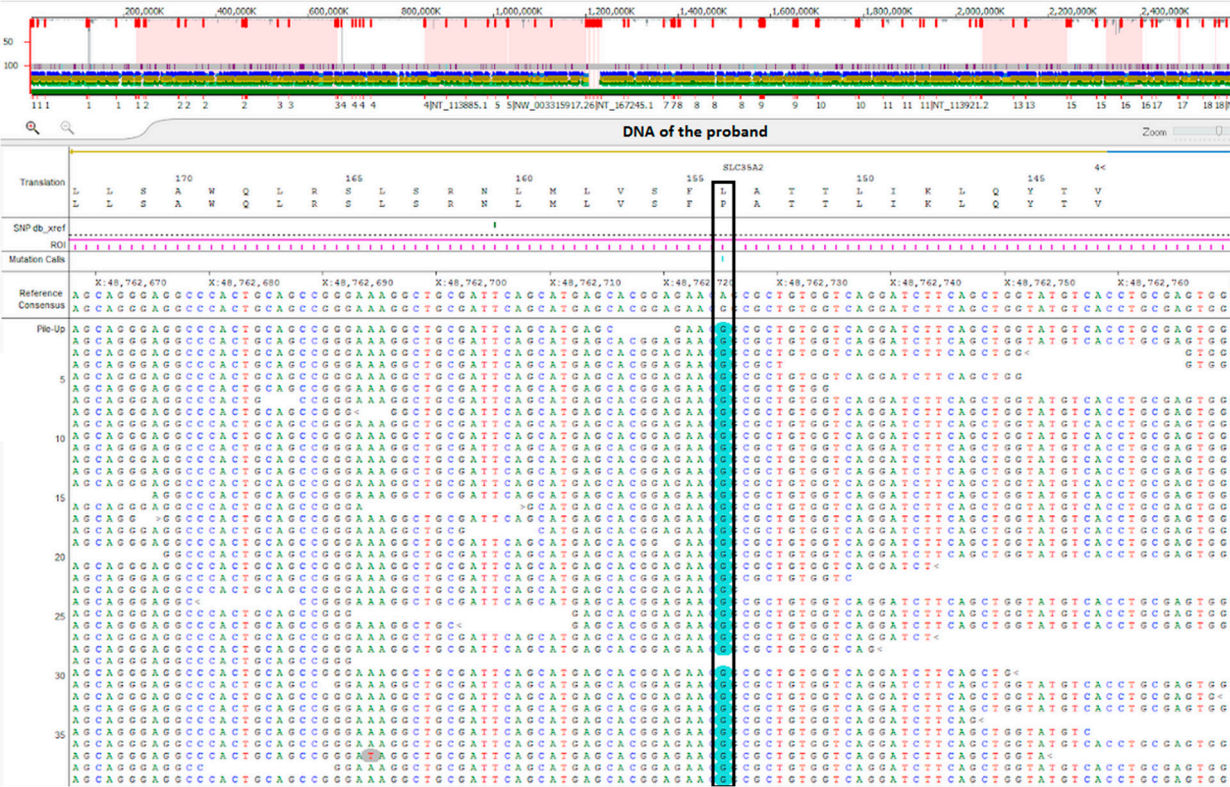

Figure S5. Analysis of DNA sequence of the selected region of SLC35A2 gene - proband.

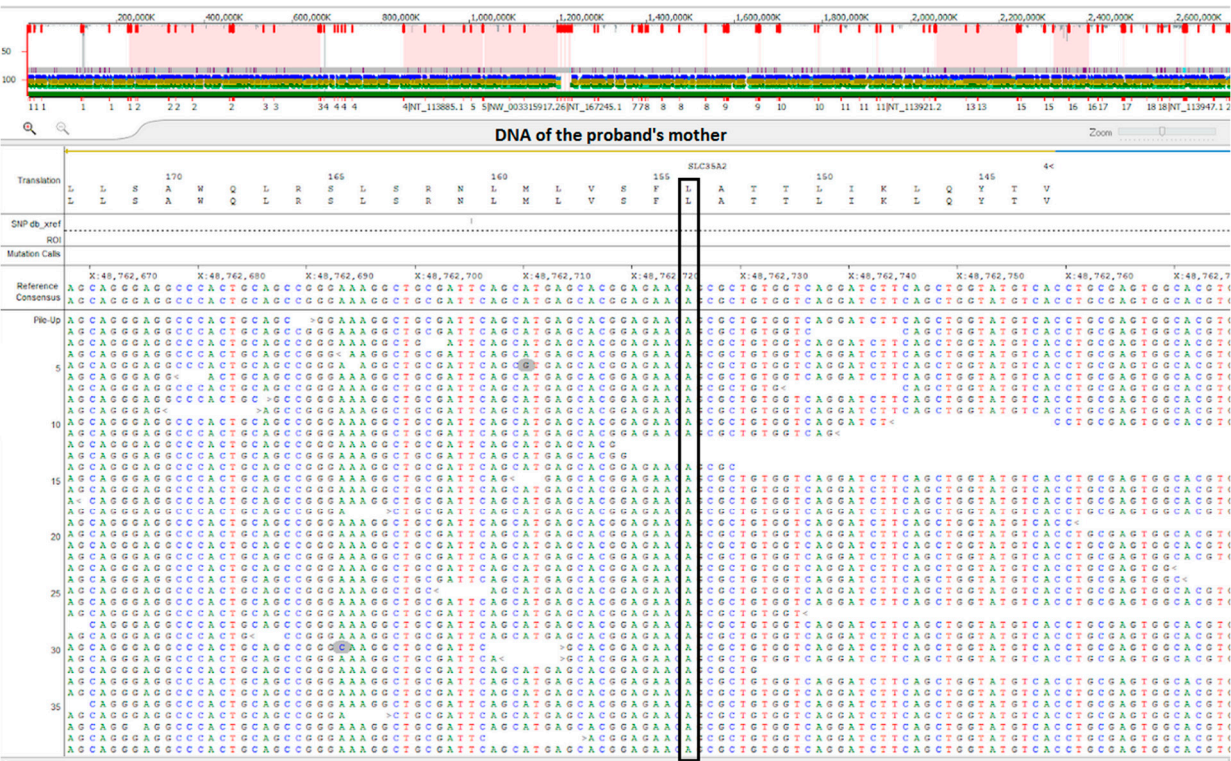

Figure S6. Analysis of DNA sequence of the selected region of SLC35A2 gene - mother.



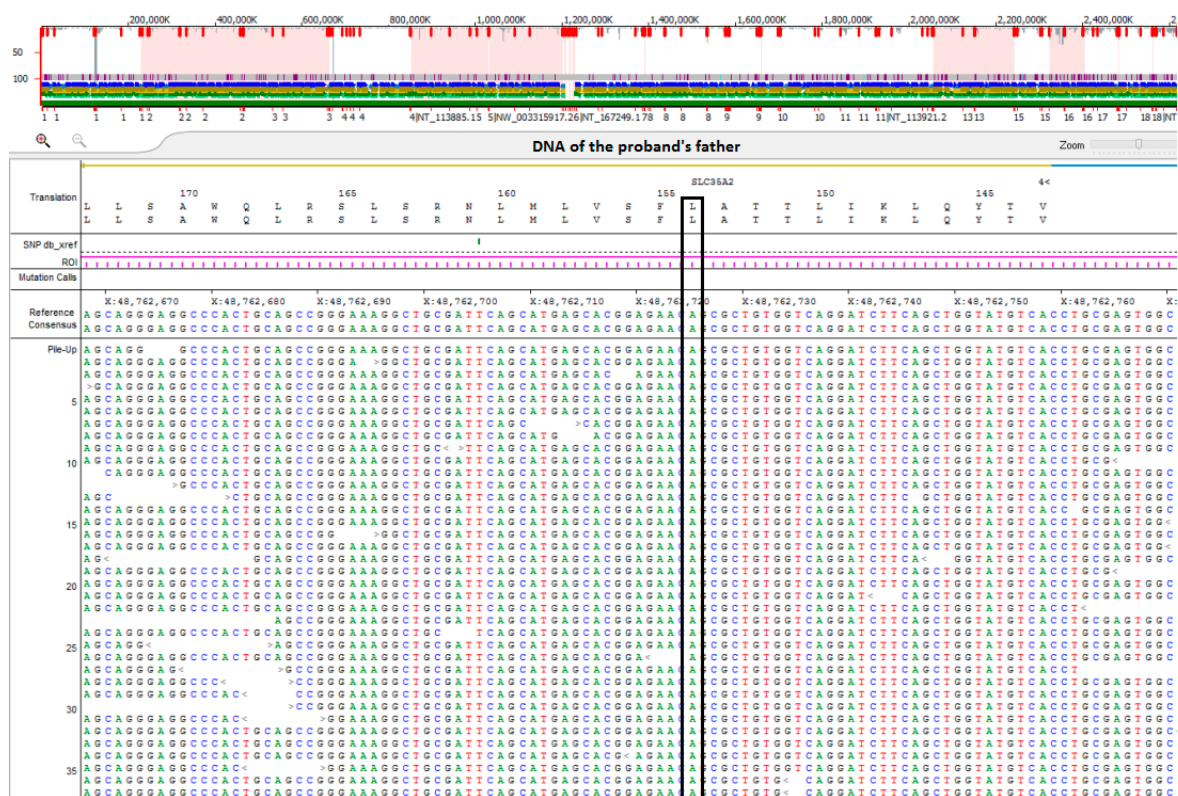

Figure S7. Analysis of DNA sequence of the selected region of SLC35A2 gene - father.
